# Supplementary material
Source: PubMed Central journal article supplement (PMC4377728)
Supplement: thnov05p0597s1.pdf [file thnov05p0597s1.pdf]

**Supplementary Materials for**

**Molecular imaging of tumor-infiltrating macrophages in a preclinical mouse model of breast cancer**

Xianlei Sun<sup>#1</sup>, Duo Gao<sup>#1</sup>, Liquan Gao<sup>1</sup>, Chenran Zhang<sup>1</sup>, Xinhe Yu<sup>1</sup>, Bing Jia<sup>1</sup>, Fan Wang<sup>1,2</sup>, Zhaofei Liu<sup>1\*</sup>

<sup>1</sup> Medical Isotopes Research Center and Department of Radiation Medicine, School of Basic Medical Sciences, Peking University, Beijing 100191, China

<sup>2</sup> Interdisciplinary Laboratory, Institute of Biophysics, Chinese Academy of Sciences, Beijing 100101, China

<sup>#</sup>: These authors contributed equally to this work.

**\*Corresponding author:** Zhaofei Liu, Ph.D., Medical Isotopes Research Center and Department of Radiation Medicine, School of Basic Medical Sciences, Peking University, Beijing 100191, China. Phone: +86-10-82802871; Fax: +86-10-82802871; E-mail: [liuzf@bjmu.edu.cn](mailto:liuzf@bjmu.edu.cn)

**This file contains:**

1. Supplementary Materials and Methods
2. Supplementary Figures and Figure legends

## **Supplementary Materials and Methods**

### **Preparation of DyLight755-trastuzumab conjugate**

Anti-human epidermal growth factor receptor 2 (HER2) monoclonal antibody trastuzumab was mixed with DyLight755-NHS (Pierce, Rockford, IL) in bicarbonate buffer (pH = 9.0) at a 6:1 molar ratio of DyLight755-NHS:trastuzumab. After incubation at room temperature for 1 h, the DyLight755-trastuzumab conjugate, denoted as Dye755-anti-HER2, was purified using a PD-10 desalting column (GE Healthcare, Piscataway, NJ). The degree of labeling (dye:protein ratio) for Dye755-anti-HER2 was calculated to be 3.9 based on UV measurements of  $A_{280}$  and  $A_{755}$ .

### **In vivo simultaneous NIRF imaging of Dye-anti-CD206 and Dye755-anti-HER2**

The A549 tumor-bearing nude mouse model was established by inoculating  $5 \times 10^6$  tumor cells subcutaneously into the right front flanks of female BALB/c nude mice (4–5 weeks of age; Department of Laboratory Animal Science, Peking University). For the in vivo NIRF imaging study, three A549 tumor-bearing nude mice were intravenously injected with a mixture of 0.2 nmol Dye-anti-CD206 and 0.2 nmol Dye755-anti-HER2. At 24 h postinjection, the mice were subjected to in vivo NIRF imaging using the Dylight680 spectrum (excitation = 675 nm, emission = 720 nm) and the Dylight755 spectrum (excitation = 745 nm, emission = 800 nm), respectively.

### **HER2 and CD206 overlay staining**

HER2-specific Rhodamine-trastuzumab was prepared by conjugating trastuzumab with Rhodamine-NHS, followed by PD-10 column purification. Frozen A549 tissue slices from tumor-bearing nude mice were incubated with rat anti-mouse CD206 antibody (BioLegend, San Diego, CA) for 1 h at room temperature. After washing with PBS, the slices were incubated with both Rhodamine-trastuzumab (2  $\mu\text{g}/\text{mL}$ ) and fluorescein isothiocyanate (FITC)-conjugated anti-rat secondary antibody. After a final wash with PBS, the slices were examined under a confocal fluorescence microscope.

## Supplementary Figures

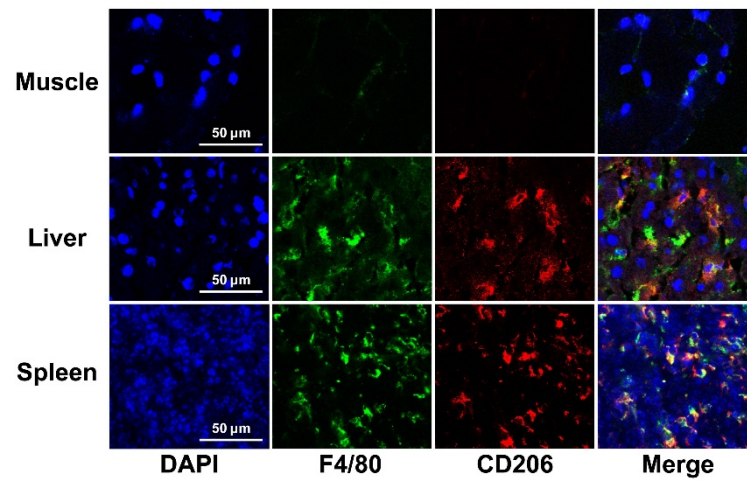

**Figure S1.** Overlay immunofluorescence staining of F4/80 and CD206 in the muscle, liver, and spleen of normal BALB/c mice.

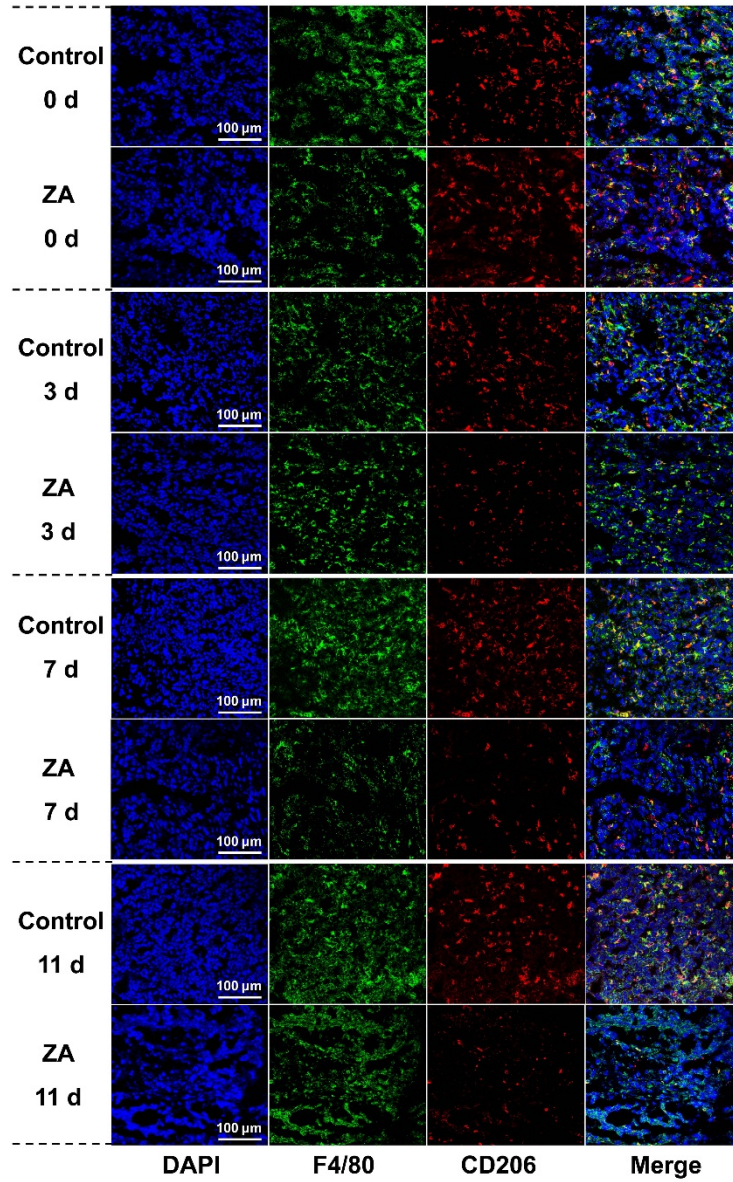

**Figure S2.** Overlay immunofluorescence staining of murine CD206 and F4/80 in 4T1 tumor tissues on days 0, 3, 7, and 11 after zoledronic acid (ZA; 150 μg/kg in PBS daily for 7 days) or PBS treatment (control).

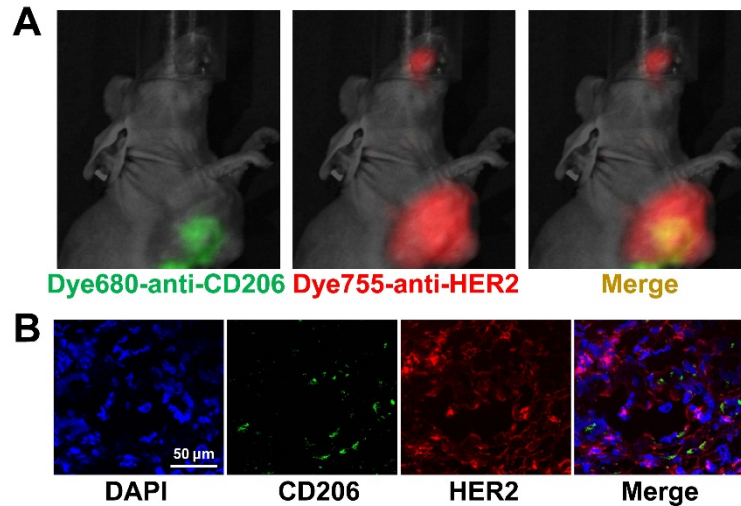

**Figure S3.** (A) Representative in vivo two-color NIRF images of 4T1 tumor-bearing mice at 24 h after injection of the mixture of Dye-anti-CD206 (Dye680-anti-CD206) and Dye755-anti-HER2. The images indicated that HER2 (imaged by Dye755-anti-HER2; red) were nearly homogenously distributed within the tumor, whereas the tumor-infiltrating macrophages (imaged by Dye680-anti-CD206; green) were located mainly in the tumor center. (B) Immunofluorescence staining demonstrated that there was no overlay between HER2 (expressed on tumor cells) and CD206 (expressed on tumor-infiltrating macrophages) in A549 tumor tissue.
